# Supplementary material for: Crystal structure of the red light-activated channelrhodopsin Chrimson
Source: PubMed Central journal article supplement (PMC6158191; doi:10.1038/s41467-018-06421-9), 2018-09-26
Supplement: 41467_2018_6421_MOESM2_ESM.pdf [file 41467_2018_6421_MOESM2_ESM.pdf]

**Editorial Note:** This manuscript has been previously reviewed at another journal that is not operating a transparent peer review scheme. The manuscript was considered suitable for publication without further review at Nature Communications.
